# Supplementary material
Source: PubMed Central journal article supplement (PMC4139206)
Supplement: supp_M114.565507_jbc.M114.565507-1.pdf [file supp_M114.565507_jbc.M114.565507-1.pdf]

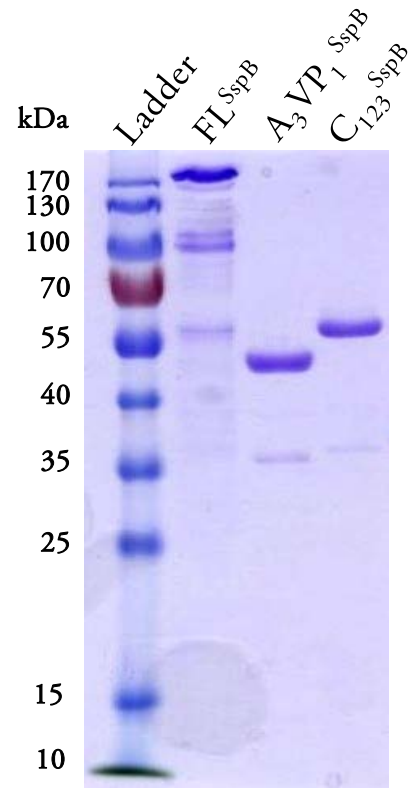

**Figure S1** Recombinantly expressed and purified fragments of *S. gordonii* DL1 FL<sup>SspB</sup>, A<sub>3</sub>VP<sub>1</sub><sup>SspB</sup>, and C<sub>123</sub><sup>SspB</sup> stained with coomassie blue on a 12.5% SDS-PAGE gel.

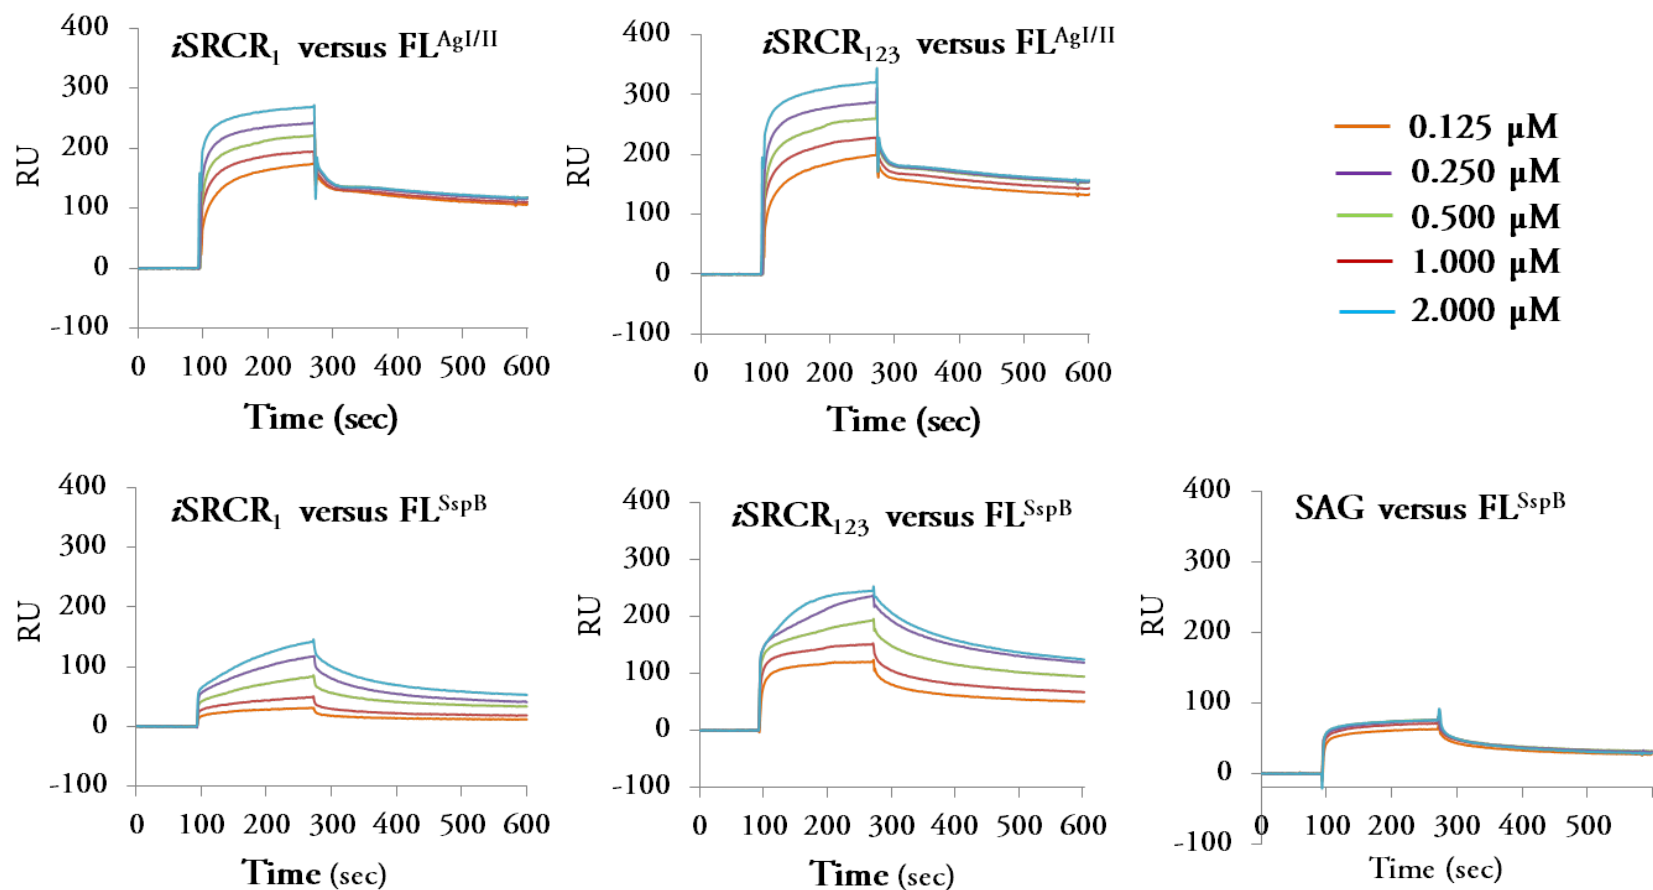

**Figure S2A.** Sensorgrams from surface plasmon resonance studies showing the interaction of  $FL^{Agl/II}$  and  $FL^{SspB}$  at various concentrations with immobilized  $iSRCR_1$ ,  $iSRCR_{123}$  and SAG.

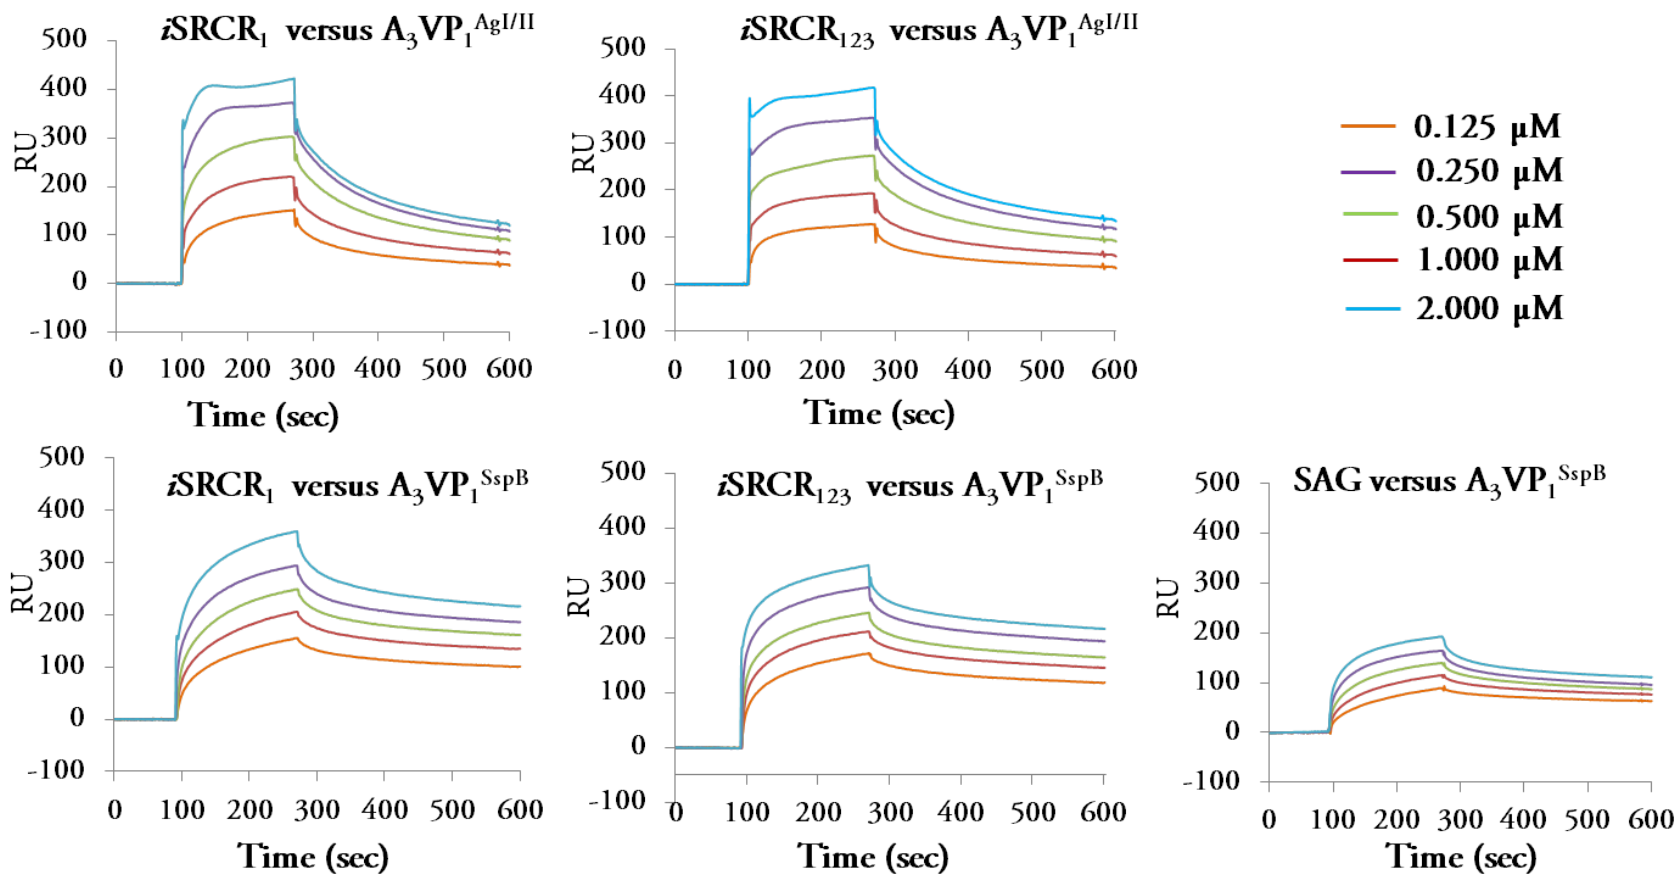

**Figure S2B.** Sensorgrams from surface plasmon resonance studies showing the interaction of  $A_3VP_1^{AgI/II}$  and  $A_3VP_1^{SspB}$  at various concentrations with immobilized  $iSRCR_1$ ,  $iSRCR_{123}$  and SAG.

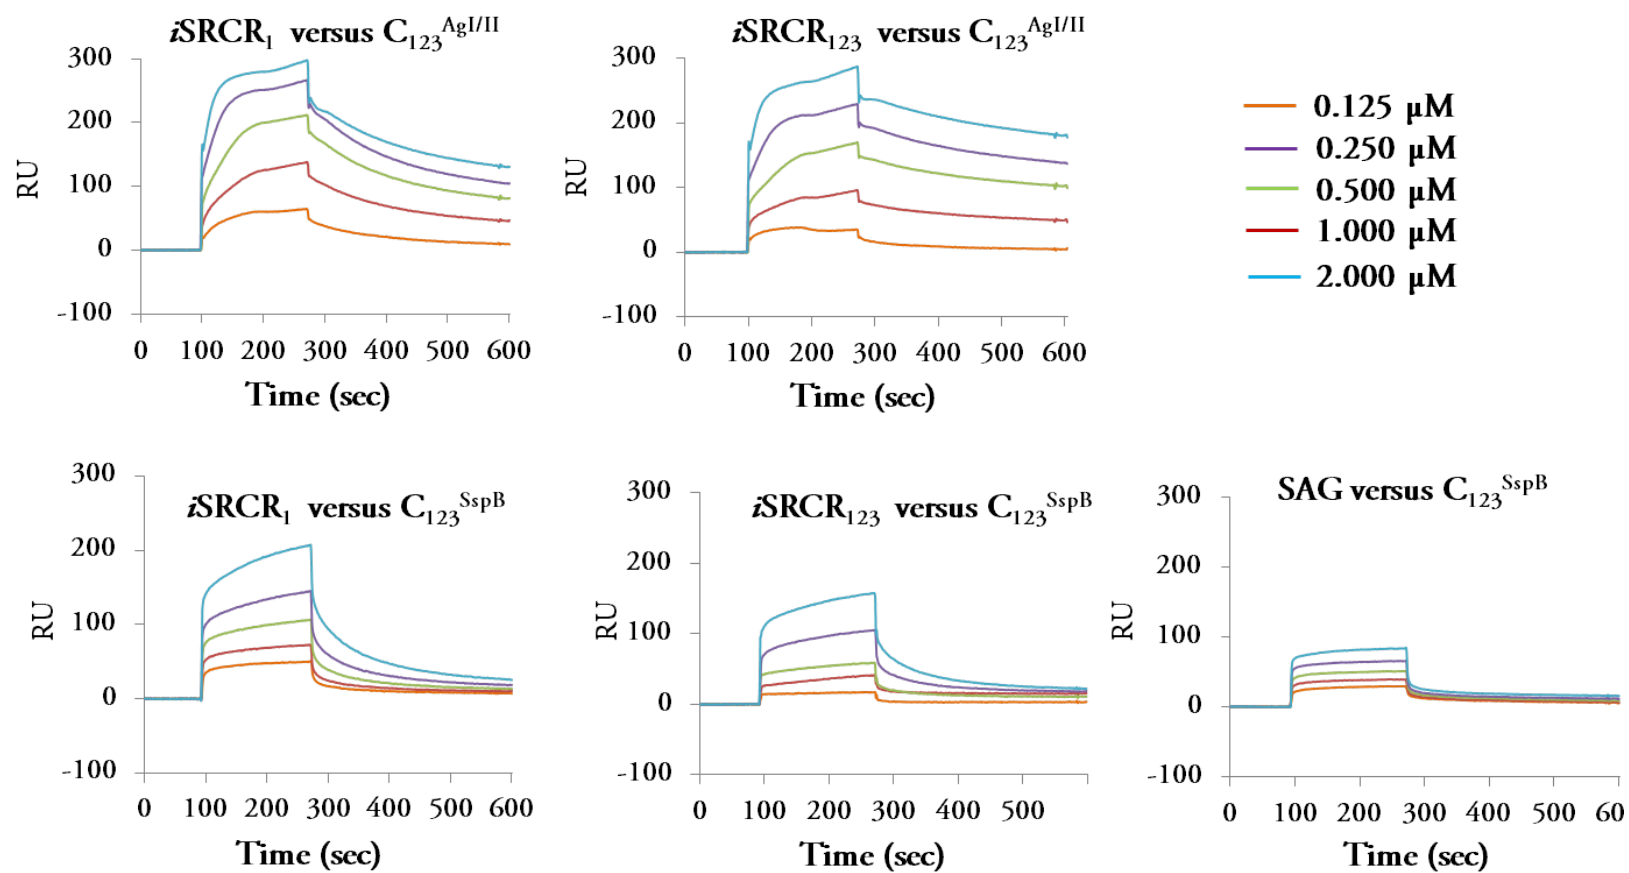

**Figure S2C.** Sensorgrams from surface plasmon resonance studies showing the interaction of  $C_{123}^{AgI/II}$  and  $C_{123}^{SspB}$  at various concentrations with immobilized  $iSRCR_1$ ,  $iSRCR_{123}$  and SAG.

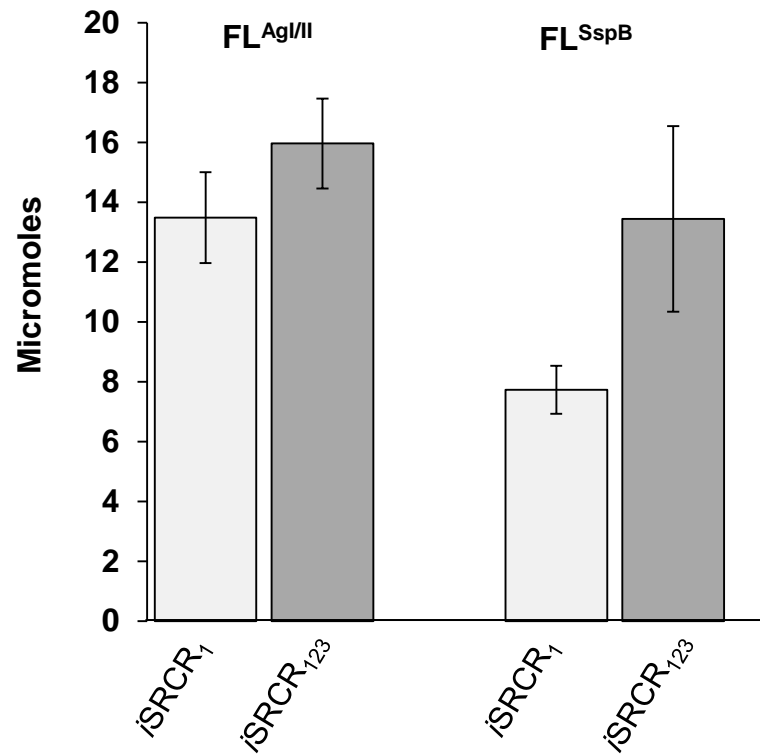

**Figure S3:** Concentration of  $FL^{AgI/II}$  and  $FL^{SspB}$  bound to immobilized  $iSRCR_1$  and  $iSRCR_{123}$  on CM5 sensor chip.

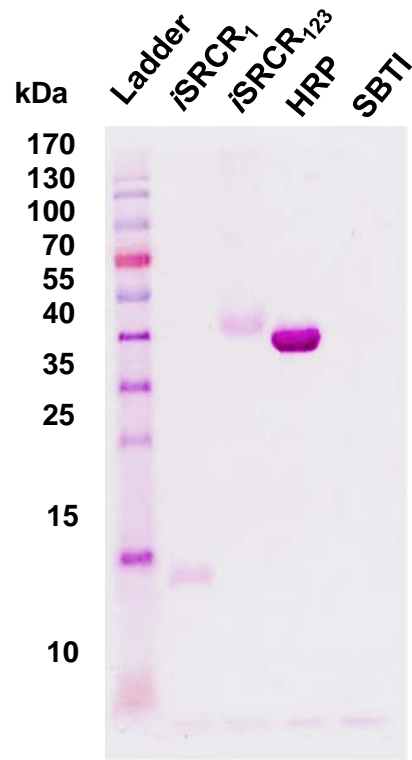

**Figure S4.** Glycoprotein stained SDS-PAGE gel containing *iSRCR*'s, horse radish peroxidase (HRP, positive control) and soybean trypsin inhibitor (SBTI, negative control).

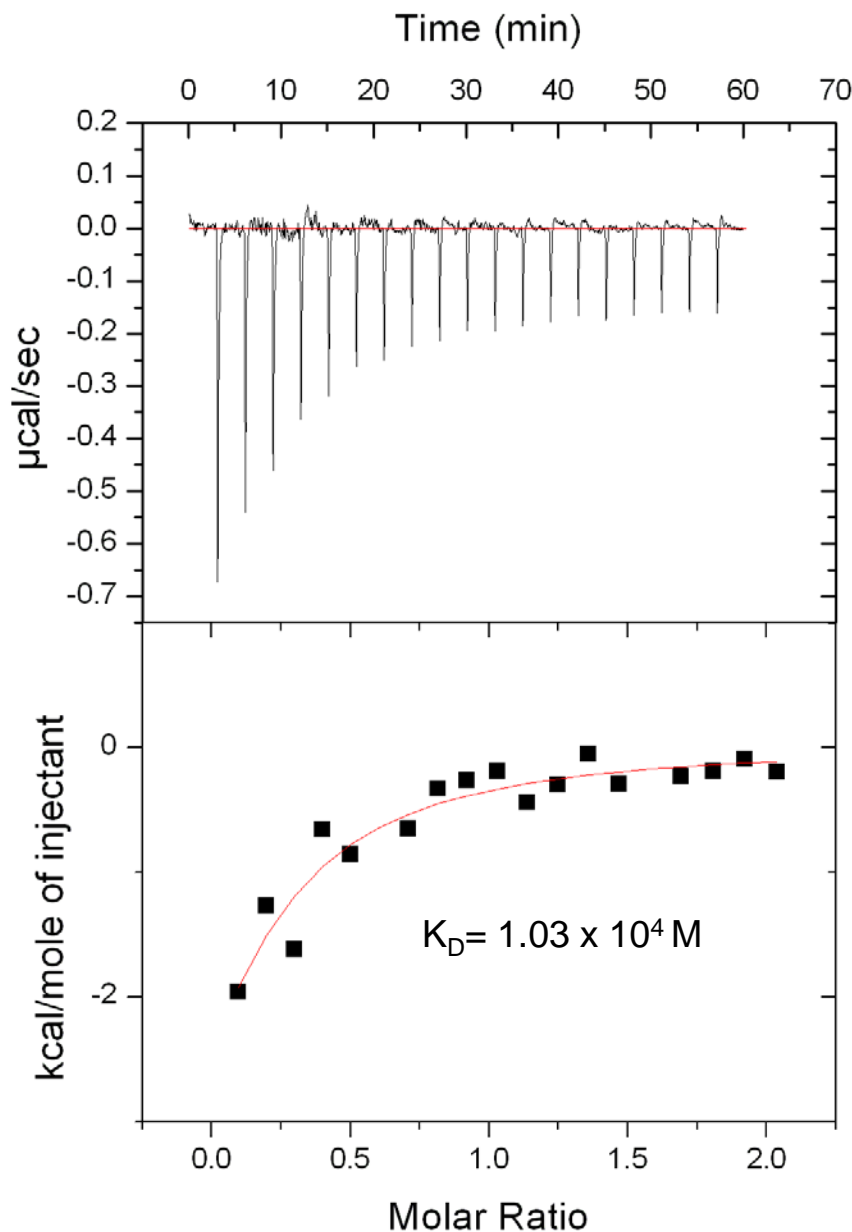

**Figure S5.** Binding of  $iSRCR_{123}$  in solution with  $FL^{Agl/II}$ . *S1 Methods.* Calorimetric titrations of  $iSRCR_{123}$  with  $FL^{Agl/II}$  was performed using Auto-ITC titration calorimetry (MicroCal, LLC). The  $iSRCR_{123}$  at a concentration of 20  $\mu\text{M}$  of 400  $\mu\text{l}$  was loaded onto calorimetric cell and  $FL^{Agl/II}$  of 200  $\mu\text{M}$  of 120  $\mu\text{l}$  at 10 fold higher concentration to that of cell concentration was loaded in syringe. Buffer containing 20 mM HEPES, 150 mM NaCl and 2.5 mM  $\text{CaCl}_2$  and temperature of 25°C was maintained throughout the experiment. After the initial injection of 1  $\mu\text{L}$ , 19 injections of 6  $\mu\text{l}$  each from the syringe was injected at 300 seconds interval. Similarly, for control instead of  $FL^{Agl/II}$  in syringe, buffer was titrated against SRCRs in the cell. The heat evolved or absorbed during the reaction between the titrant and reactant was noted and the resulting data was fit to a single binding site model using Origin software (Version 7.0383 with MicroCal ITC-analysis module) from which the  $K_D$  was calculated. *Result:* The ITC experiment clearly indicated the weak millimolar level binding of  $iSRCR_{123}$  in solution ( $K_D = 1.03 \times 10^4 \text{ M}$ ) with  $FL^{Agl/II}$ . The data fit had very large  $\chi^2$  values, and this is indicative of non-specific interactions with very weak affinity.

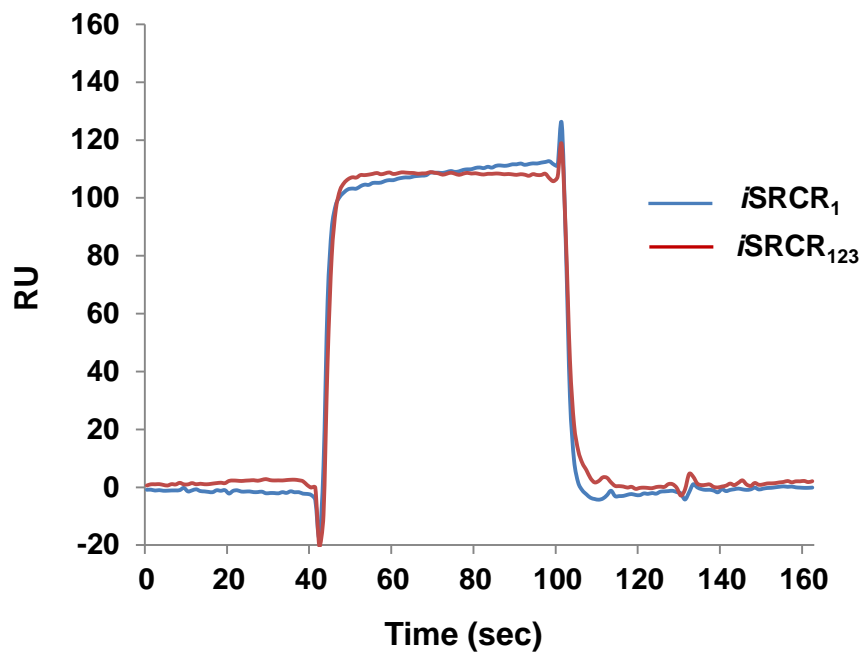

**Figure S6.** Large changes in RU were observed upon the addition of 2.5 mM CaCl<sub>2</sub> to the immobilized *iSRCR*<sub>1</sub> and *iSRCR*<sub>123</sub>. Such changes in RU are directly attributable to the SRCR conformational changes. In control experiments, the immobilized FL<sup>AgI/II</sup> had no changes upon calcium addition (data not shown).



Table S1. Primers used for cloning fragments of SspB of *S. gordonii* DL1.

| Construct                                                   |                 | Primers                                        |
|-------------------------------------------------------------|-----------------|------------------------------------------------|
| FL <sup>SspB</sup><br>(39-1433)                             | (NcoI) Forward  | 5'-TATAACCATGGATGAAGTTACAGAGACAACCTAGTACAAG-3' |
|                                                             | (NotI) Reverse  | 5'-TTATAGCGGCCGCAGGATCCTTTGGTTTTGGCGTTGG-3'    |
| A <sub>3</sub> VP <sub>1</sub> <sup>SspB</sup><br>(386-805) | (NcoI) Forward  | 5'-GCGCCATGGATACCAATGAAGCAGACTACCAA-3'         |
|                                                             | (NotI) Reverse  | 5'-ATAATTTGCGGCCGCTGGTTTTGATGGCTCCGG-3'        |
| C <sub>123</sub> <sup>SspB</sup><br>(913-1406)              | (BamHI) Forward | 5'-TATAAGGATCCATTTCCACTATAGCAGTTTATTAGC-3'     |
|                                                             | (XhoI) Reverse  | 5'-TTATACTCGAGAGATGCATAAGCAACCTTATTAACAG-3'    |

Table S2. Analytes, Ligand and buffer details of SPR experiments.

| Analyte                                         | Ligand             |                      |          | Running Buffer                                                   | Regeneration Buffer for Ligands 1 and 2 | Regeneration buffer for Ligand 3 |
|-------------------------------------------------|--------------------|----------------------|----------|------------------------------------------------------------------|-----------------------------------------|----------------------------------|
|                                                 | Ligand 1           | Ligand 2             | Ligand 3 |                                                                  |                                         |                                  |
| FL <sup>Ag/II</sup>                             | iSRCR <sub>1</sub> | iSRCR <sub>123</sub> | SAG      | 20 mM HEPES, pH 7.4,<br>150 mM NaCl,<br>2.5 mM CaCl <sub>2</sub> | 1 M NaCl,<br>20 mM EDTA, pH 7.4         | 10 mM HCl                        |
| A <sub>3</sub> VP <sub>1</sub> <sup>Ag/II</sup> | iSRCR <sub>1</sub> | iSRCR <sub>123</sub> | SAG      | 20 mM HEPES, pH 7.4,<br>150 mM NaCl,<br>2.5 mM CaCl <sub>2</sub> | 1 M NaCl,<br>20 mM EDTA, pH 7.4         | 10 mM HCl                        |
| C <sub>123</sub> <sup>Ag/II</sup>               | iSRCR <sub>1</sub> | iSRCR <sub>123</sub> | SAG      | 20 mM HEPES, pH 7.4,<br>150 mM NaCl,<br>2.5 mM CaCl <sub>2</sub> | 1 M NaCl,<br>20 mM EDTA, pH 7.4         | 10 mM HCl                        |
| FL <sup>SspB</sup>                              | iSRCR <sub>1</sub> | iSRCR <sub>123</sub> | SAG      | 20 mM HEPES, pH 7.4,<br>150 mM NaCl,<br>2.5 mM CaCl <sub>2</sub> | 1 M NaCl,<br>20 mM EDTA pH 7.4          | 10 mM HCl                        |
| A <sub>3</sub> VP <sub>1</sub> <sup>SspB</sup>  | iSRCR <sub>1</sub> | iSRCR <sub>123</sub> | SAG      | 20 mM HEPES, pH 7.4,<br>150 mM NaCl,<br>2.5 mM CaCl <sub>2</sub> | 1 M NaCl,<br>20 mM EDTA, pH 7.4         | 10 mM HCl                        |
| C <sub>123</sub> <sup>SspB</sup>                | iSRCR <sub>1</sub> | iSRCR <sub>123</sub> | SAG      | 20 mM HEPES, pH 7.4,<br>150 mM NaCl,<br>2.5 mM CaCl <sub>2</sub> | 1 M NaCl,<br>20 mM EDTA, pH 7.4         | 10 mM HCl                        |
| iSRCR <sub>1</sub>                              | iSRCR <sub>1</sub> | iSRCR <sub>123</sub> |          | 20 mM HEPES, pH 7.4,<br>150 mM NaCl,<br>2.5 mM CaCl <sub>2</sub> | 10 mM HCl                               |                                  |
| iSRCR <sub>123</sub>                            | iSRCR <sub>1</sub> | iSRCR <sub>123</sub> |          | 20 mM HEPES, pH 7.4,<br>150 mM NaCl,<br>2.5 mM CaCl <sub>2</sub> | 10 mM HCl                               |                                  |
| 2.5 mM CaCl <sub>2</sub>                        | iSRCR <sub>1</sub> | iSRCR <sub>123</sub> |          | 20 mM HEPES, pH 7.4,<br>150 mM NaCl                              | 1 M NaCl,<br>20 mM EDTA, pH 7.4         |                                  |
